# Supplementary material for: UHPLC-Orbitrap-HRMS Identification of 51 Oleraceins (Cyclo-Dopa Amides) in Portulaca oleracea L. Cluster Analysis and MS2 Filtering by Mass Difference
Source: Preprints.org preprint supplement (doi:10.20944/preprints202109.0048.v1), 2021-09-02

Figure S1. Estimating the optimal number of clusters with *k-means* clustering

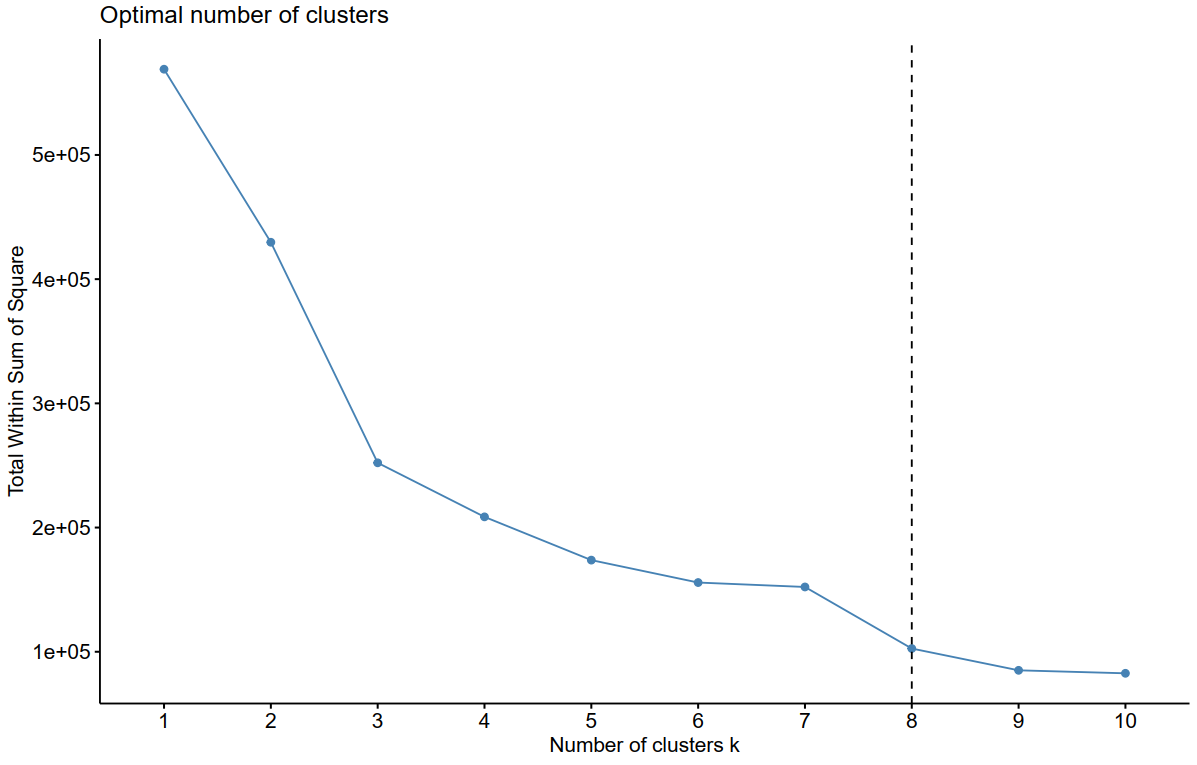


Figure S2. Estimating the optimal number of clusters with *pam* clustering


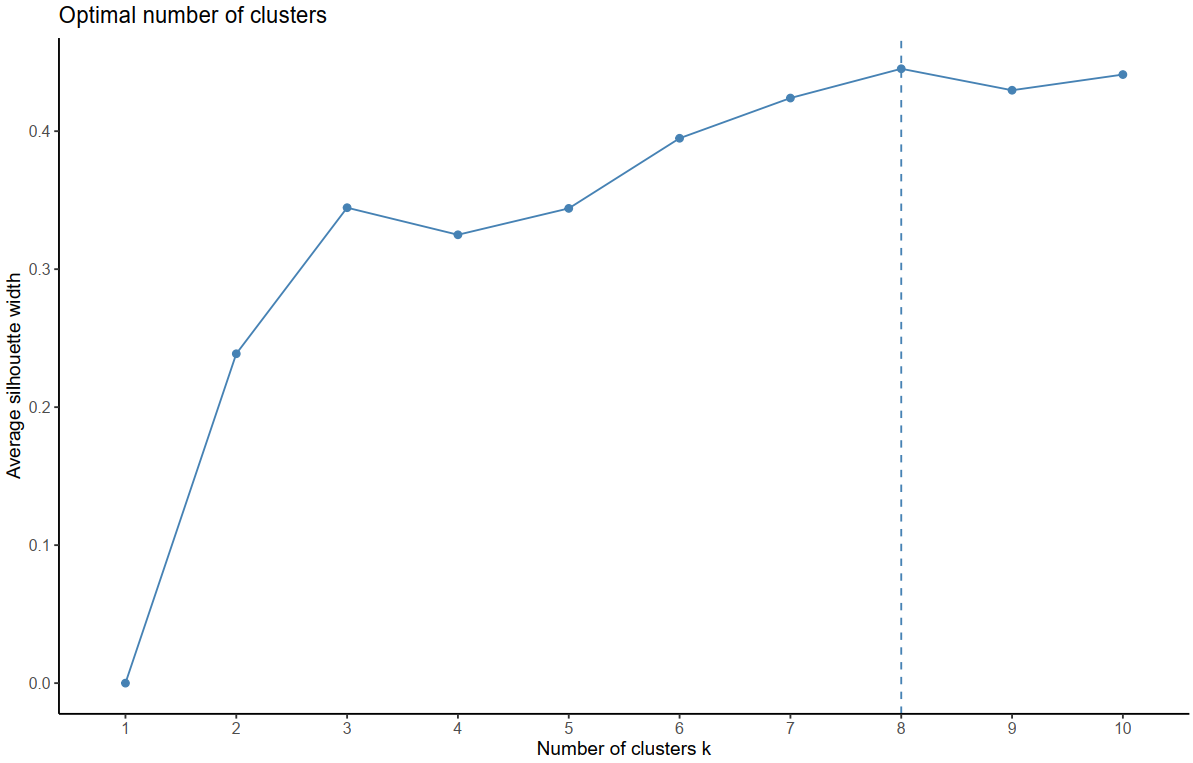


Figure S3. Scree plot representing the percentage of variances explained by each principal component

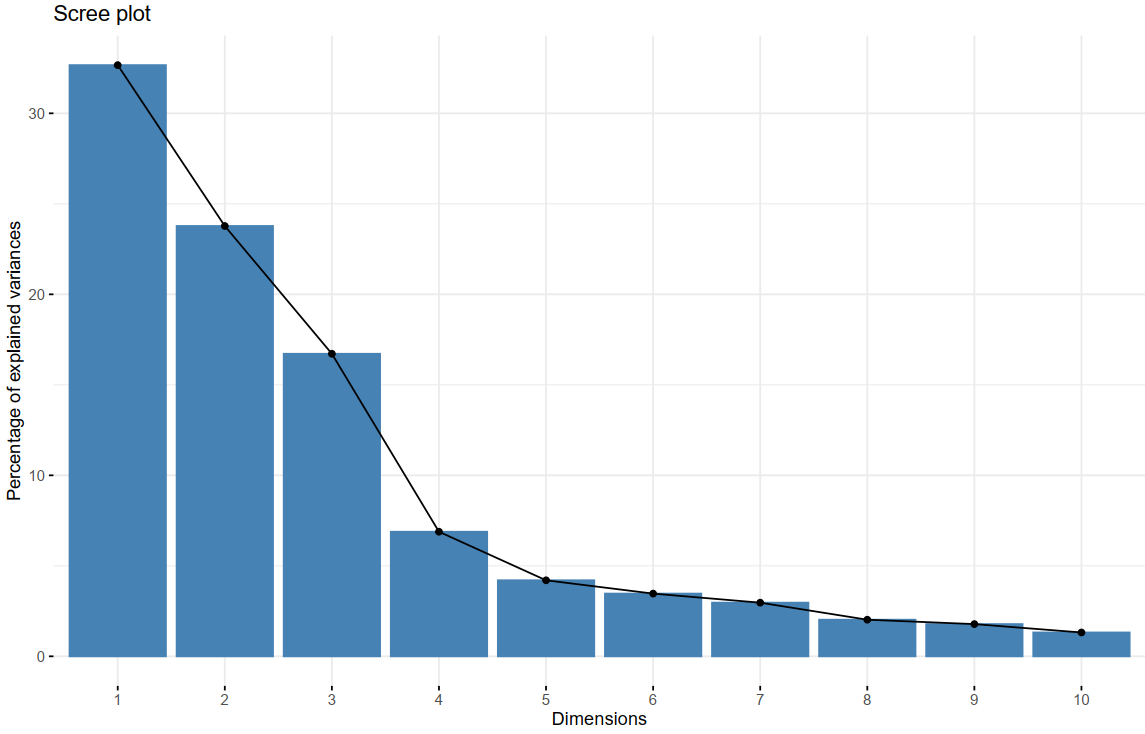


Figure S4. Visualization of the quality of representation of individuals (cos2)

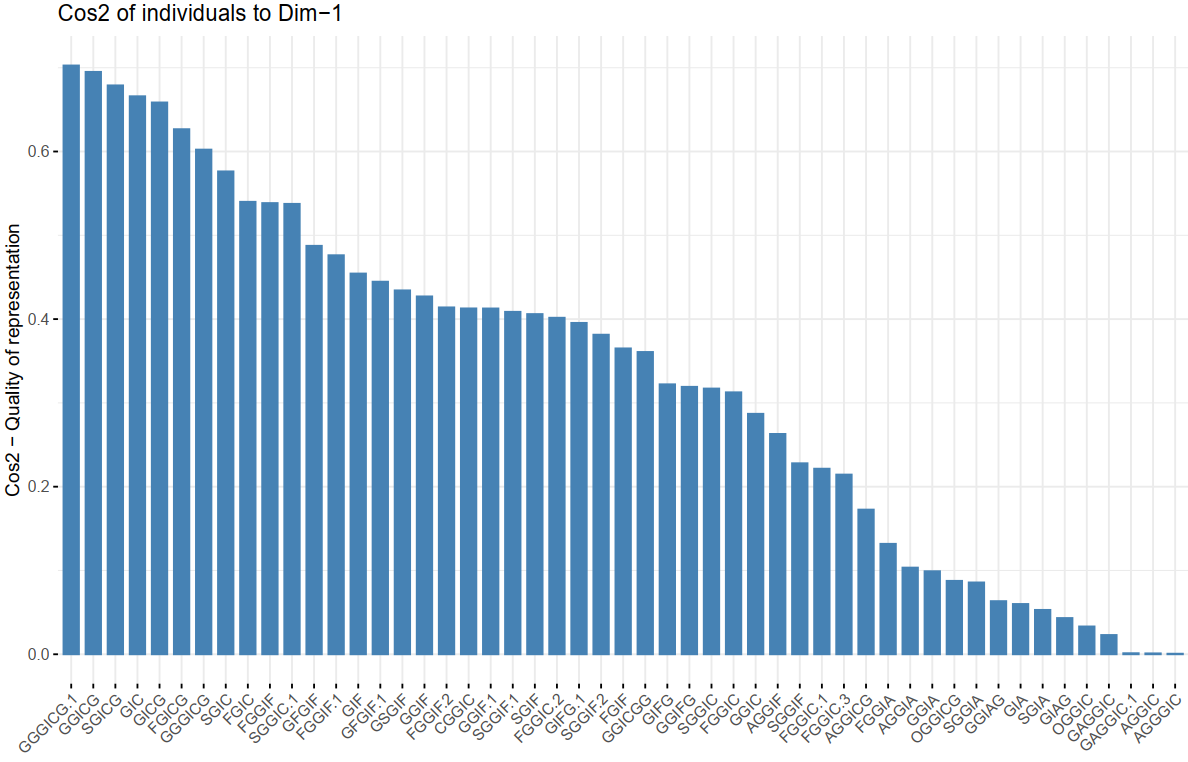


Figure S5. Visualization of the contribution of individuals on PC1 and PC2

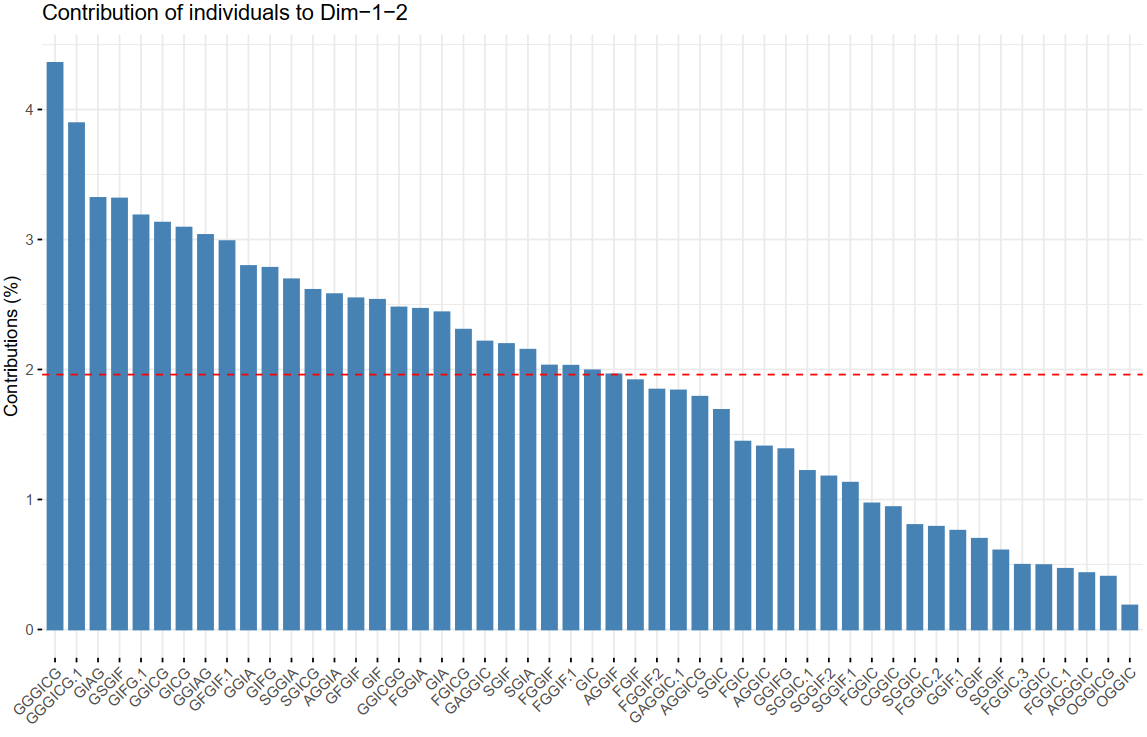

Supplement: Supplementary file 1 [file supplementary]
